# Supplementary material
Source: PubMed Central journal article supplement (PMC3197336)
Supplement: supp_00124.2011_suppmat.pdf [file supp_00124.2011_suppmat.pdf]

**Supplemental Table S1: Primers used in the study.**

| <b>Gene</b>                         | <b>Primers</b>                                                                                           |
|-------------------------------------|----------------------------------------------------------------------------------------------------------|
| AT1aR Amplification                 | Forward 5'-ATAAGAATGCGGCCGCTCTGAGACCAACTCAACCCA-3'<br>Reverse 5'-ATAAGAATGCGGCCGCCATTGCCAGTGTGCTTTGAA-3' |
| KAP2-AT1aR (N111G)<br>Genotyping    | Forward 5'-AATGGTGCTAATGGCAATGG-3'<br>Reverse 5'-AGAGGGTAGGGATCATGACAA-3'                                |
| KAP2-AT1aR (N111G)<br>Transgene     | Forward 5'-AAATGAGCACGCTTTCTTACCGGC-3'<br>Reverse 5'-AGTGGACGTAGGTGTTGAAAGCCA-3'                         |
| Total AT1aR                         | Forward 5'-TGGCCAAAGTCACCTGCATCATCA-3'<br>Reverse 5'-CGCGCACACTGTGATATTGGTGTT-3'                         |
| Mouse $\beta$ -Actin                | Forward 5'-CATCCTCTTCCTCCCTGGAGAAGA-3'<br>Reverse 5'-ACAGGATTCCATACCCAAGAAGGAAGG-3'                      |
| NHE3                                | Forward 5'-TCCTCTCAGCCATTGAGGACATCT-3'<br>Reverse 5'-ACTTTGCTGAGGAACTTCCGGTCA-3'                         |
| NKCC2A                              | Forward 5'-CCATGGTAACCTCTATCACTGGGT-3'<br>Reverse 5'-TCAAGCCTATTGACCCACCGAACT-3'                         |
| NKCC2B                              | Forward 5'-TGACAGTGACAGCCATCACAGGTT-3'<br>Reverse 5'-TCAAGCCTATTGACCCACCGAACT-3'                         |
| NKCC2F                              | Forward 5'-TCATGCTCTTCATTGCGCTCTCCT-3'<br>Reverse 5'-ACCACTCCGTTTGTGCAAATAGCC-3'                         |
| NCC                                 | Forward 5'-AAGTCGGGTGGCACCTATTTCCCTT-3'<br>Reverse 5'-TTACGGTTTCTGCAAAGCCCACAG-3'                        |
| ENaC- $\alpha$                      | Forward 5'-ACAATGGTTTGTCCCTGACACTGC-3'<br>Reverse 5'-TCACGTTGAAGCCACCATCATCCA-3'                         |
| ENaC- $\beta$                       | Forward 5'-TCTGCCAACCCTGGGACTGAATTT-3'<br>Reverse 5'-TGGCATAGATGCCCTCCTCTCTAA-3'                         |
| ENaC- $\gamma$                      | Forward 5'-GCCAATCAGTGTGCAAGCAATCCT-3'<br>Reverse 5'-TTATTTGCTGGCTTTGGTCCCAGG-3'                         |
| Na-K-ATPase                         | Forward 5'-TGAAGCTGACACCACGGAGAATCA-3'<br>Reverse 5'-TGCCCGCTTAAGAATAGGCAGGTT-3'                         |
| Na-PO <sub>4</sub> -Cotransporter 2 | Forward 5'-TACCTCTTTGTCTGCTCCCTGGAT-3'<br>Reverse 5'-ACTGGAActCTGCACCAGAActGT-3'                         |
| Renin                               | Forward 5'-TGCTTGTGGGATTCACAGCCTCTA-3'<br>Reverse 5'-TGTGTCACAGTGATTCCACCCACA-3'                         |
| Angiotensinogen                     | Forward 5'-ACGACCTCCTGACTTGGATAGAGA-3'<br>Reverse 5'-TGTTGTTcAGATTTGCCTCCGCAC-3'                         |
| Endogenous AT1aR                    | Forward 5'-ATATGGAAGTGCCTCGCTGCTGAT-3'<br>Reverse 5'-TATGTTAAGTCCGGGAGAGCAG-3'                           |
| AT1bR                               | Forward 5'-GAGCAGCCAAGAGGCGTGAAAGAA-3'<br>Reverse 5'-GGATCATGTCTCTTTGTTGGAGGG-3'                         |
| AT2R                                | Forward 5'-TGCGGGAGCTGAGTAAGCTGATTT-3'<br>Reverse 5'-GGTAATGTTTCTGCTGGTGGCA-3'                           |
| ACE                                 | Forward 5'-GATCCTGCTAGACATGGAGACAAC-3'<br>Reverse 5'-CGGGATGTGGCCATCATGTTTGT-3'                          |
| ACE2                                | Forward 5'-GTTGGCAAGCAGCTGAGGC-3'<br>Reverse 5'-AGTTGTAGCCATCTGCTCC-3'                                   |
| Screening KO mice                   | Forward 5'-CTCCTCACCTCAATGACCTTA-3'<br>Reverse 5'-TCTGTTTCCTATTTATGGCCT-3'                               |

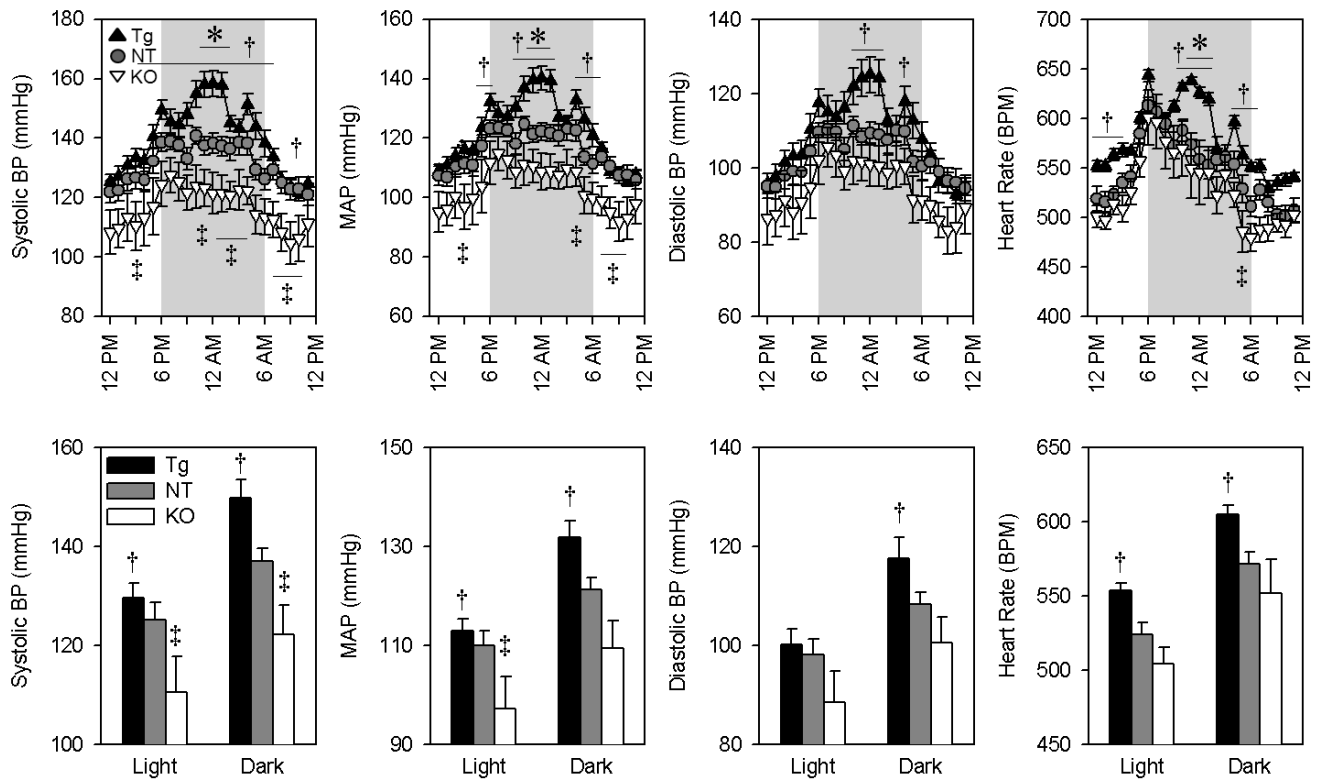

Figure S1. Arterial pressures of testosterone-treated male and female transgenic and PCT-depleted mice measured by radiotelemetry.

Top: 24 hour systolic, mean and diastolic blood pressure and heart rate. Bottom: The same data shown in the top panel is averaged across the light and dark phases. Symbols indicate statistical significance ( $p < 0.05$ ) at the indicated time interval (top) or for the indicated period (bottom) for the following comparisons: \*, transgenic vs NT; ‡, knockout vs cre- control mice; †, transgenic vs depleted. NT  $n=14$  (gray circles), Tg  $n=6$  (black triangles), KO  $n=8$  (white upside down triangles).
